# Supplementary material for: Heterogeneous adhesion of cells on polymer surfaces with underlying amorphous/crystalline phases
Source: Royal Society of Chemistry journal article supplement (doi:10.1039/c7tb03250a), 2018-01-01
Supplement: c7tb03250a1.pdf [file c7tb03250a1.pdf]

## Electronic Supplementary Information (ESI)

# Heterogeneous adhesion of cells on polymer surface with underlying amorphous/crystalline phases

Hisao Matsuno, <sup>\*a,b</sup> Shunya Irie,<sup>a</sup> Toyoaki Hirata,<sup>a</sup> Ruriko Matsuyama,<sup>a</sup> Yukari Oda,<sup>a</sup> Hiroyasu Masunaga,<sup>c</sup> Yukiko Seki,<sup>d</sup> Sadahito Aoshima,<sup>d</sup> and Keiji Tanaka<sup>\*a,b</sup>

<sup>a</sup> Department of Applied Chemistry, Kyushu University, Fukuoka 819-0395, Japan

<sup>b</sup> International Institute for Carbon-Neutral Energy Research (WPI-I2CNER), Kyushu University, Fukuoka 819-0395, Japan

<sup>c</sup> Japan Synchrotron Radiation Research Institute (JASRI), Hyogo 679-5198, Japan

<sup>d</sup> Department of Macromolecular Science, Osaka University, Osaka 560-0043, Japan

<sup>\*</sup>To whom correspondence should be addressed

FAX: +81-92-802-2880      TEL: +81-92-802-2878

E-mail: h-matsuno@cstf.kyushu-u.ac.jp & k-tanaka@cstf.kyushu-u.ac.jp

## 1. Polymer syntheses

Scheme S1 shows a synthetic route of poly(2-methoxyethyl vinyl ether-*b*-L-lactic acid) P(MOVE-*b*-LLA). Poly(2-methoxyethyl vinyl ether) (PMOVE) was first synthesized by base-assisting living cationic polymerization of 2-methoxyethyl vinyl ether (MOVE) using 1-(2-methoxyethoxy)ethyl acetate (MOEA) as an initiator. Polymerization reaction was terminated by ethylene glycol, resulting in an introduction of a hydroxy group at the chain end portion. Molecular weight characteristics of PMOVE were determined by gel permeation chromatography (GPC), as described below, and they were used as a macroinitiator for the following polymerization without purification.

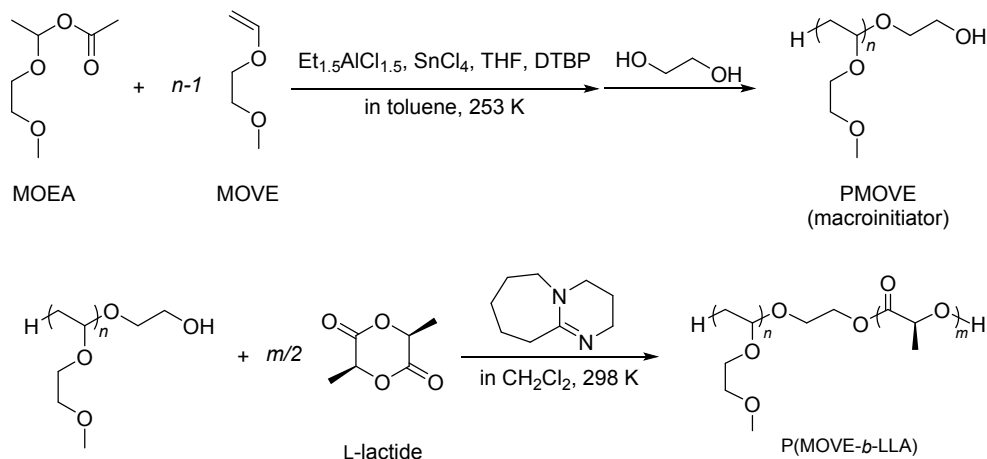

**Scheme S1.** A synthetic route of P(MOVE-*b*-LLA). A macroinitiator having a hydroxy group (PMOVE) was synthesized by living cationic polymerization in toluene at 253 K under the presence of ethylaluminum sesquichloride ( $\text{Et}_{1.5}\text{AlCl}_{1.5}$ ),  $\text{SnCl}_4$ , tetrahydrofuran (THF), and 2,6-di-*tert*-butylpyridine (DTBP). Subsequently, a diblock copolymer was synthesized by 1,8-diazabicyclo[5.4.0]undec-7-ene (DBU)-catalyzed ring-opening polymerization of L-lactide in dichloromethane at 298 K.

Ring-opening polymerization of L-lactide was conducted under the presence of cyclic organic amidine catalyst, 1,8-diazabicyclo[5.4.0]undec-7-ene (DBU), as shown in Scheme S1. Table S1 summarizes reaction conditions.

**Table S1.** Conditions for ring-opening polymerization of L-lactide using PMOVE as a macroinitiator. Reactions were conducted in dichloromethane at 298 K for 3 h. <sup>a</sup>A number-average molecular weight ( $M_n$ ) and a polydispersity index ( $M_w/M_n$ ), where  $M_w$  denotes a weight-average molecular weight, of each macroinitiator were determined by gel permeation chromatography (GPC) with polystyrene standards (PS). Chromatograms are shown in Fig. S1.

| entry | macroinitiator | $M_n^a$ | $M_w/M_n^a$ | $[\text{macroinitiator}]_0$<br>/ mM | $[\text{L-lactide}]_0$<br>/ M | $[\text{DBU}]_0$<br>/ mM |
|-------|----------------|---------|-------------|-------------------------------------|-------------------------------|--------------------------|
| 1     | PMOVE-1        | 9.9k    | 1.09        | 4.0                                 | 0.40                          | 5.0                      |
| 2     | PMOVE-2        | 10.3k   | 1.08        | 4.0                                 | 0.20                          | 5.0                      |
| 3     | PMOVE-3        | 17.6k   | 1.07        | 4.0                                 | 0.16                          | 5.0                      |

Panels (a–c) of Fig. S1 show GPC curves for (upper) macroinitiator PMOVEs and (lower) P(MOVE-*b*-LLA)s obtained under different reaction conditions. For example, in the case of entry 1, a number-average molecular weight ( $M_n$ ) and a polydispersity index ( $M_w/M_n$ ), where  $M_w$  denotes a weight-average molecular weight, of PMOVE were 9.9k and 1.09, respectively, as shown in panel (a). Conversion of ring-opening polymerization was estimated to be 98% after 3 h-polymerization reaction. After purification using preparative GPC, the  $M_n$  and  $M_w/M_n$  values of P(MOVE-*b*-LLA) obtained were determined to be 25.2k and 1.12, respectively. Numbers of averaged MOVE ( $n$ ) and LLA ( $m$ ) repeating units were determined by  $^1\text{H}$ -nuclear magnetic resonance ( $^1\text{H}$ -NMR) spectroscopy. Characteristics of three P(MOVE-*b*-LLA)s are summarized in Table S2.

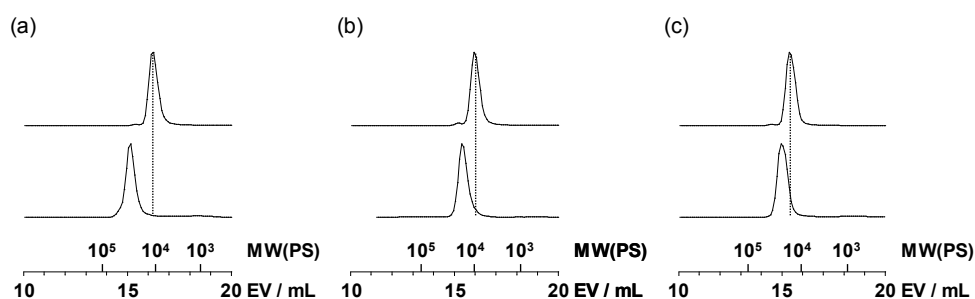

**Fig. S1.** GPC curves for PMOVEs and P(MOVE-*b*-LLA)s obtained under each reaction condition; (a) entry 1, (b) entry 2, and (c) entry 3 shown in Table S1. Upper and lower chromatograms show macroinitiator PMOVE and corresponding P(MOVE-*b*-LLA), respectively. EV: elution volume, MW(PS): molecular weight of polystyrene.

**Table S2.** Characteristics of P(MOVE-*b*-LLA)s determined by GPC with PS standards and  $^1\text{H}$ -NMR spectroscopy.

| Entry | $M_n$ | $M_w/M_n$ | $n$ | $m$ |
|-------|-------|-----------|-----|-----|
| 1     | 25.2k | 1.12      | 98  | 180 |
| 2     | 16.5k | 1.08      | 107 | 74  |
| 3     | 24.1k | 1.06      | 183 | 80  |

Scheme S2 shows a synthetic route of a PLLA homopolymer. Benzyl alcohol was used as an initiator for ring-opening polymerization of L-lactide in the presence of DBU. The product was purified by reprecipitation.

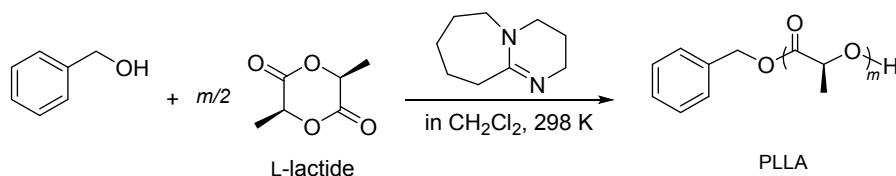

**Scheme S2.** A synthetic route for PLLA.

Fig. S2 shows a GPC chromatogram for PLLA. The  $M_n$  and  $M_w/M_n$  values were determined to be 18.0k and 1.20, respectively.

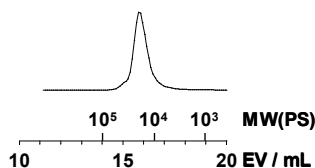

**Fig. S2.** GPC curve for poly(L-lactide) obtained in dichloromethane at 298 K. Polymerization condition: [L-lactide]<sub>0</sub> = 0.56 M, [benzyl alcohol]<sub>0</sub> = 4.0 mM, [DBU]<sub>0</sub> = 5.0 mM.

## 2. Bulk thermal property

Thermal properties of P(MOVE-*b*-LLA) and PLLA were examined by differential scanning calorimetry (DSC, EXSTAR6000 DSC6220, Hitachi High-Tech Science, Tokyo, Japan). Fig. S3 shows typical DSC thermograms for the samples. While the crystallization and melting temperatures for P(MOVE-*b*-LLA) were approximately 350 and 395 K, respectively, these temperatures of PLLA were approximately 375 and 413 K, respectively.

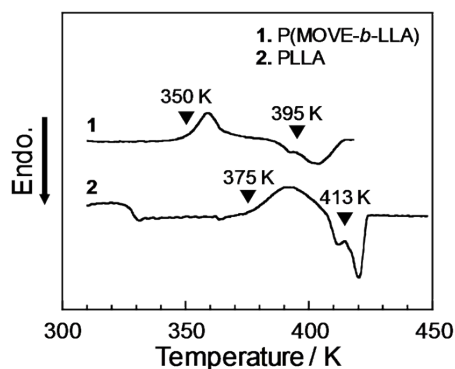

**Fig. S3.** DSC thermograms for P(MOVE-*b*-LLA) with the  $M_n$  of 25.2k and  $M_w/M_n$  of 1.12 and PLLA with the  $M_n$  of 18.0k and  $M_w/M_n$  of 1.20, respectively. The samples were heated up from 303 K to 423 K for P(MOVE-*b*-LLA) and from 303 K to 453 K for PLLA upon the first scan at 10 K·min<sup>-1</sup>. The data were from the second scan at the heating rate of 2 K·min<sup>-1</sup>.

## 3. Bulk crystalline structure

Aggregation structures of P(MOVE-*b*-LLA) were examined by small angle X-ray scattering (SAXS) analyses. Bulk films were prepared on polyimide substrates by a solvent-casting method. The films were melted at 423 K and then isothermally crystallized at 353 K. The SAXS measurements were performed at the BL03XU beamline of SPring-8 (Japan Synchrotron Radiation Research Institute, Hyogo, Japan). The X-ray wavelength was 0.1 nm and the camera distance was 2,224 mm. An

imaging plate was used to record two-dimensional SAXS patterns. The calibration of the scattering angle was carried out using diffraction from a regular structure in silver behenate. Fig. S4 shows typical one-dimensional SAXS profiles obtained by integration of the full range of angles of patterns for P(MOVE-*b*-LLA) films without/with thermal annealing. For the non-annealed film, one peak and one slight shoulder with a relative  $q$  position of 1:2 were discernible, suggesting that a microphase-separated lamellar structure was formed. From the position  $q$  of the first-order peak ( $0.266 \text{ nm}^{-1}$ ), the repeating period ( $d$ ) was simply calculated to be  $23.6 \text{ nm}$  using  $2\pi/q$ . After the thermal annealing, the  $q$  value decreased to  $0.220 \text{ nm}^{-1}$ , or  $d = 28.6 \text{ nm}$ , and the shoulder became clear. This result means that the crystallization of PLLA was promoted due to the thermal annealing.

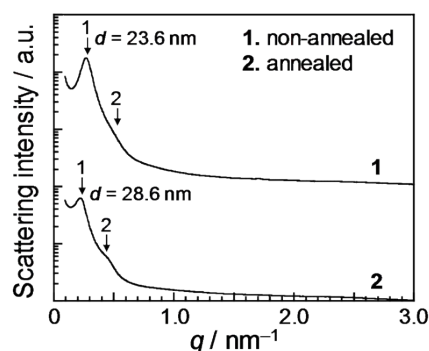

**Fig. S4.** One-dimensional SAXS intensity profile for a bulk film of P(MOVE-*b*-LLA) with  $M_n$  of 16.5k and  $M_w/M_n$  of 1.08, which was isothermally crystallized at 353 K. As a reference, a non-annealed film was also measured.

#### 4. Surface structure

Thin films of P(MOVE-*b*-LLA) and PLLA were prepared on Si-wafers with a native oxide layer and borosilicate glasses by a spin-coating method from its toluene solution. The thickness of the films estimated by an M-150 ellipsometer (JASCO, Tokyo, Japan) was  $150 \text{ nm}$ . The surface morphology of the films was observed with an optical microscope VHX-700F (Keyence, Osaka, Japan). In addition, a polarized optical microscope ECLIPSE ME600 (Nikon Instech, Tokyo, Japan) was used to observe the surfaces under the crossed-Nicols condition. Static contact angle measurements against the films were performed using a Drop Master 500 (Kyowa Interface Science, Niiza, Saitama, Japan) at room temperature. A droplet of water purified by a Milli-Q system (Merck KGaA, Darmstadt, Germany) was used as a probe liquid. The surface of the P(MOVE-*b*-LLA) film was further observed by atomic force microscopy (AFM, E-sweep with a SPI3800 controller, Hitachi High-Tech Science, Tokyo, Japan) using an intermittent contact mode under ambient atmosphere at room temperature. A cantilever tip micro-fabricated from Si was used for the observation. The spring constant ( $k_c$ ) and

resonance frequency were  $0.9 \text{ N}\cdot\text{m}^{-1}$  and 28 kHz, respectively. The tip radius ( $R$ ) was approximately 10 nm. The mechanical properties in the surface region of the P(MOVE-*b*-LLA) film were examined on the basis of force-distance curves by AFM (SPA-300HV, Hitachi High-Tech Science) using a contact mode at room temperature. The tip indentation rate was  $100 \text{ nm}\cdot\text{s}^{-1}$ . The surface chemical composition of P(MOVE-*b*-LLA) and PLLA films was examined by X-ray photoelectron spectroscopy (XPS) using a PHI 5800 ESCA system (Physical Electronics, Chanhassen, MN, USA) with a monochromatized  $\text{AlK}_{\alpha}$  source. The emission angle was  $15^{\circ}$ . The  $\text{C}_{1s}$  peak was calibrated to a binding energy of 285.0 eV for neutral carbons to correct the charging energy shifts.

## 5. Cell culture

P(MOVE-*b*-LLA) films isothermally crystallized for 1 hour were used as a scaffold for fibroblast cell culture. The P(MOVE-*b*-LLA) films prepared on borosilicate glasses were placed on the basement of 24-well culture dishes filled with normal Roswell Park Memorial Institute 1640 culture media (Life Technologies, Carlsbad, CA, US) with 10% fetal bovine serum (FBS, Life Technologies). L929 fibroblasts from mouse (RIKEN BRC Cell Bank) were seeded at  $5.0 \times 10^4$  cells/well. Cultures were maintained at 310 K ( $37^{\circ}\text{C}$ ) under a humidified atmosphere containing 5%  $\text{CO}_2$ . Cell adhesion states were evaluated by phase-contrast microscopy (BZ-8100, Keyence) after 4 h-culturing.
